# Supplementary material for: A Hyaluronan Hydrogel Scaffold for Culture of Human Oral Mucosal Epithelial Cells in Limbal Stem-Cell Therapy
Source: MDPI journal article supplement (doi:10.3390/bioengineering6040097), 2019-10-23
Supplement: s1 [file s1]

## Supplementary Materials

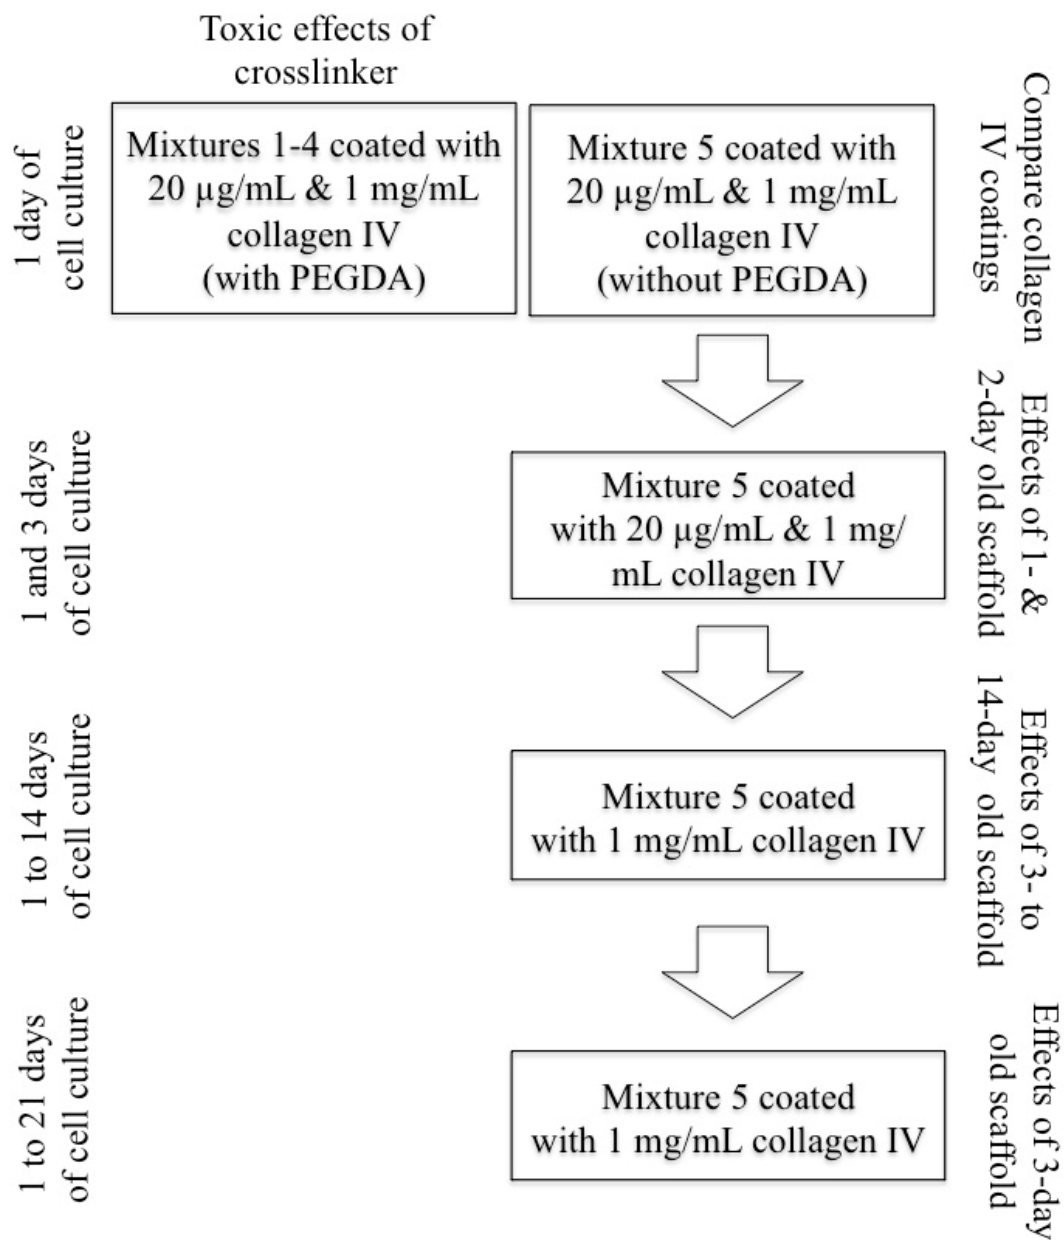

**Figure S1.** Workflow of experiments.

|           | Uncoated mixture                                                                   | Coated mixture with 20 $\mu\text{g/mL}$ collagen IV                                 | Coated mixture with 1 $\text{mg/mL}$ collagen IV                                     |
|-----------|------------------------------------------------------------------------------------|-------------------------------------------------------------------------------------|--------------------------------------------------------------------------------------|
| Mixture 1 | 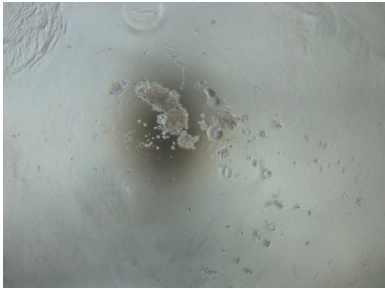  |   |   |
| Mixture 2 |   |   |   |
| Mixture 3 |  |  |  |

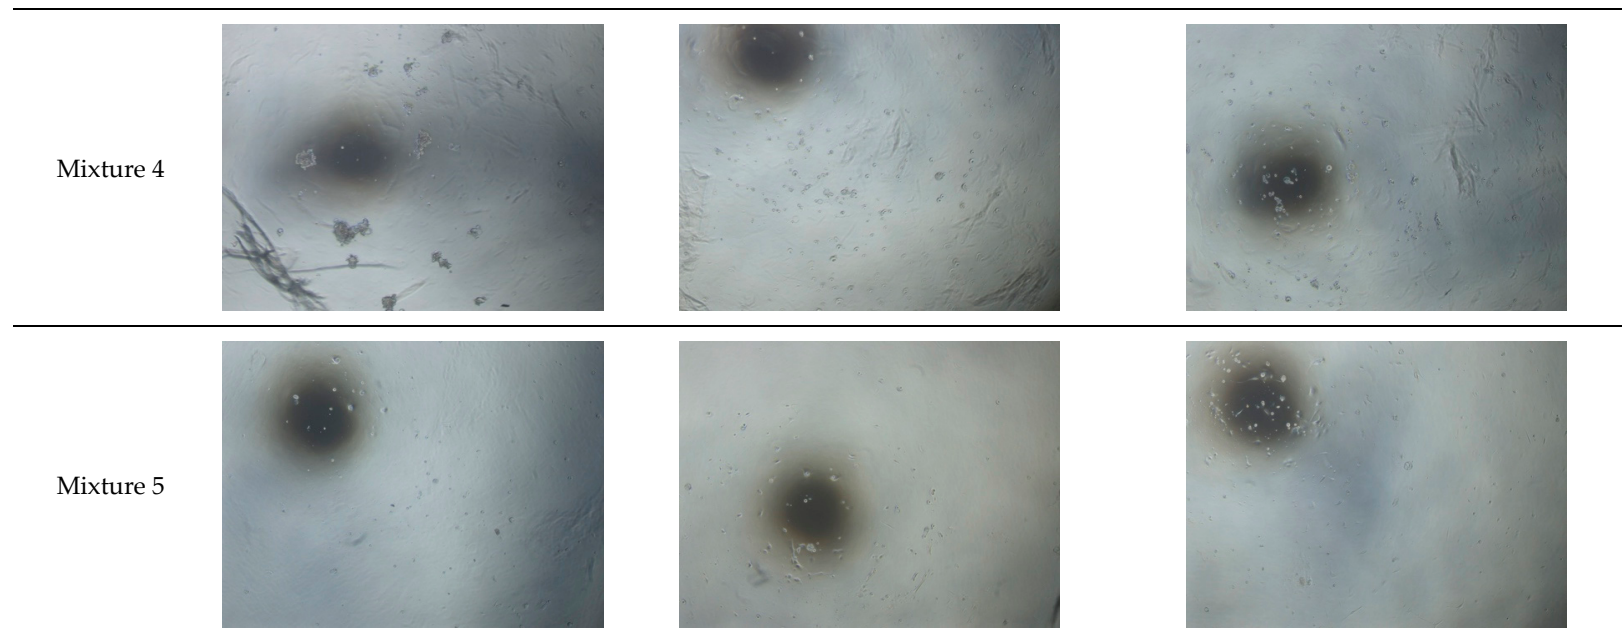

**Figure S2.** The light microscopic images (4 $\times$  magnification) of 1-day old culture of human OMECs on five different mixtures of HA scaffold uncoated and coated with 1 mg/mL and 20  $\mu$ g/mL collagen IV.

| Scaffold age  | Culture age | Control *                                                                           | Coated mixture 5 with 1 mg/mL collagen IV                                            |
|---------------|-------------|-------------------------------------------------------------------------------------|--------------------------------------------------------------------------------------|
| <b>3 days</b> |             |                                                                                     |                                                                                      |
|               | Day 1       |    |    |
|               | Day 3       |    |    |
|               | Day 7       |   |   |
|               | Day 10      |  |  |
|               | Day 14      |  |  |

**7 days**



Day 1

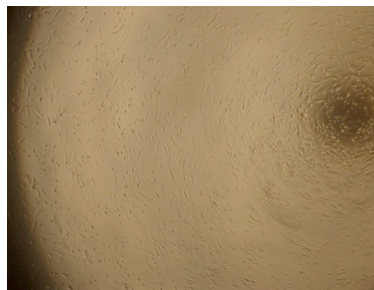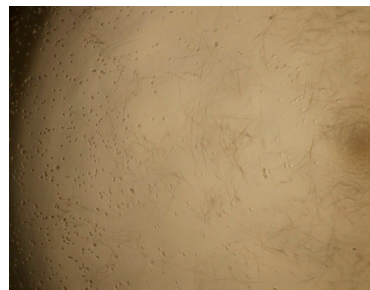

Day 3

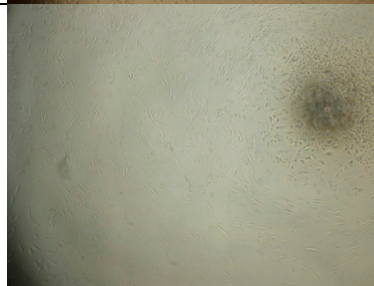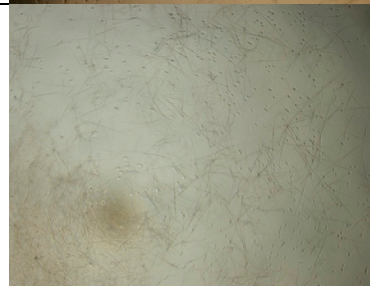

Day 7

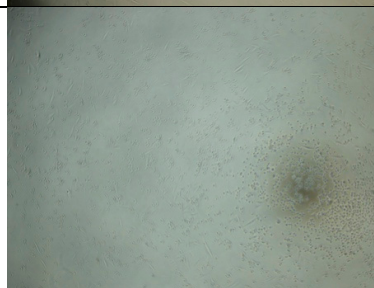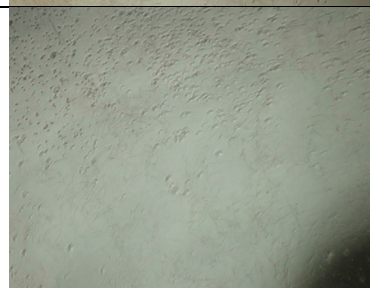

Day 10

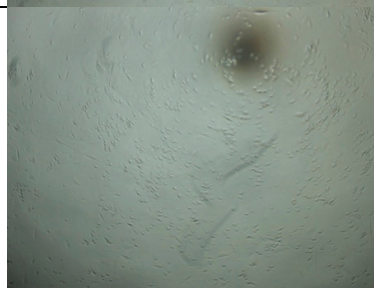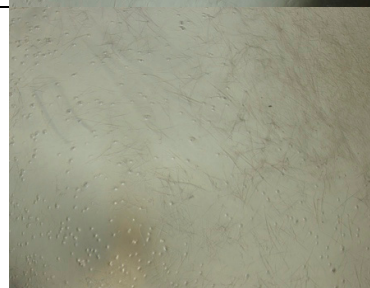

Day 14

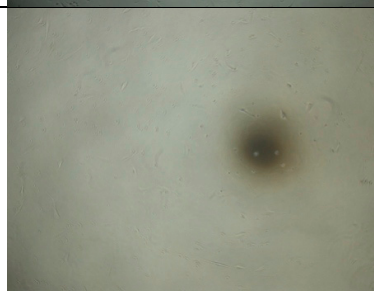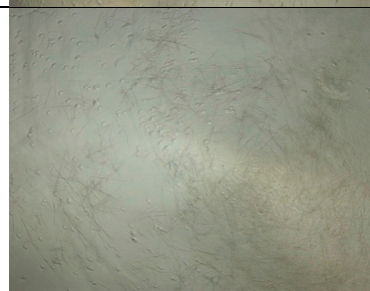

10 days

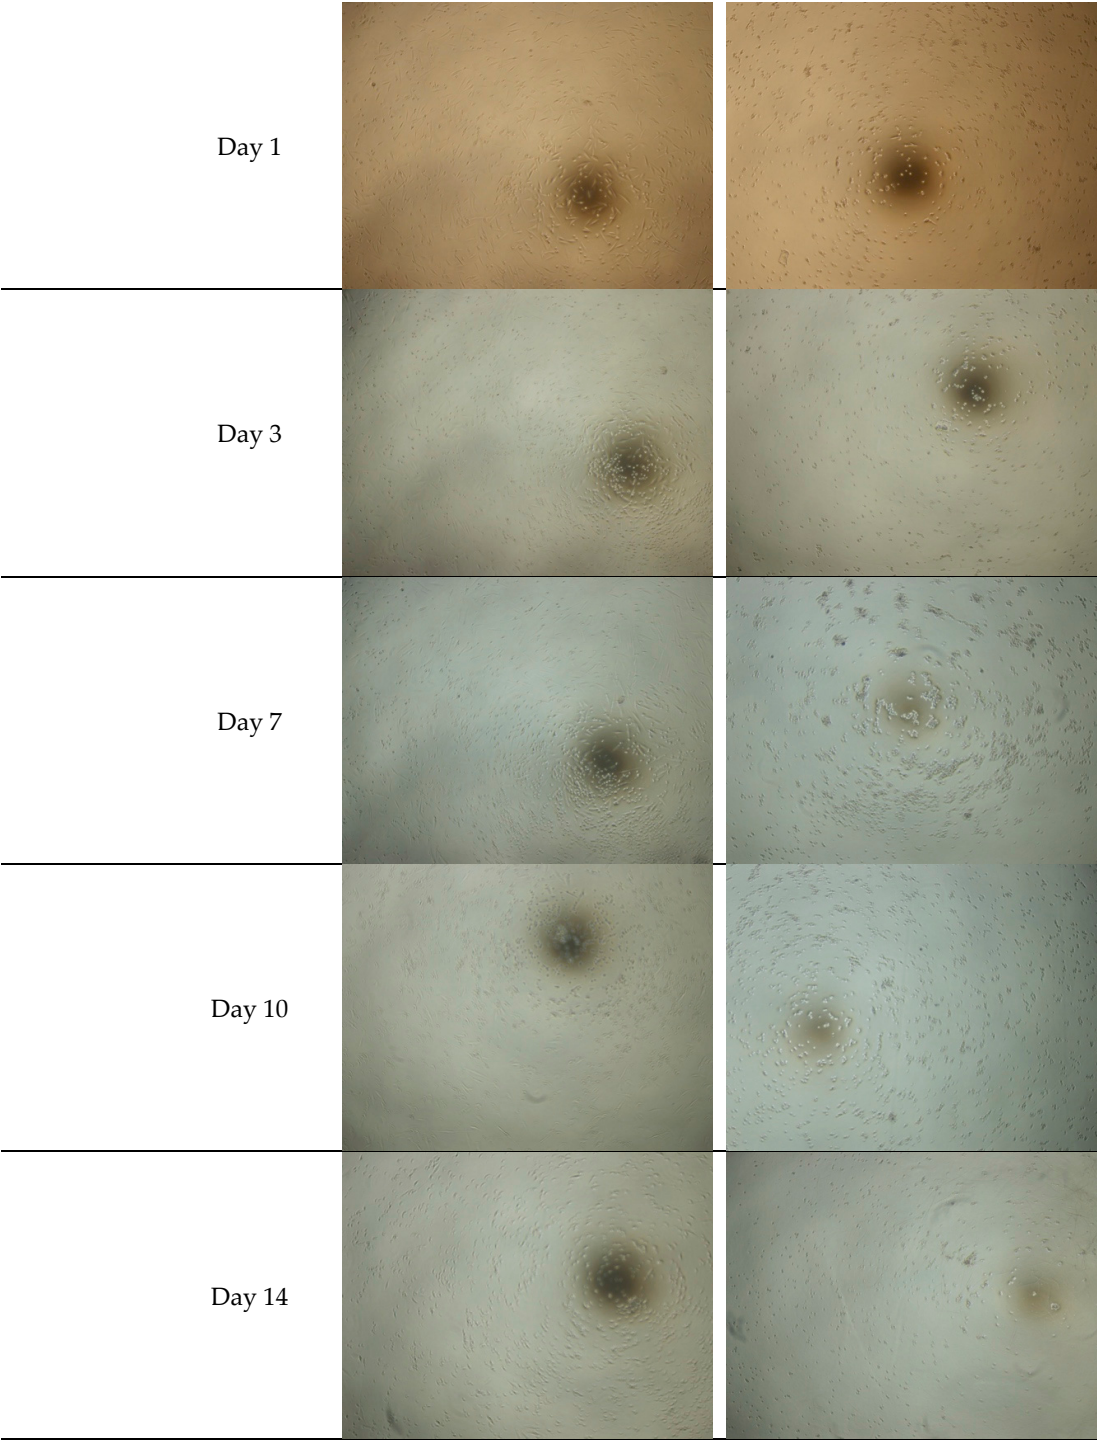

14 days



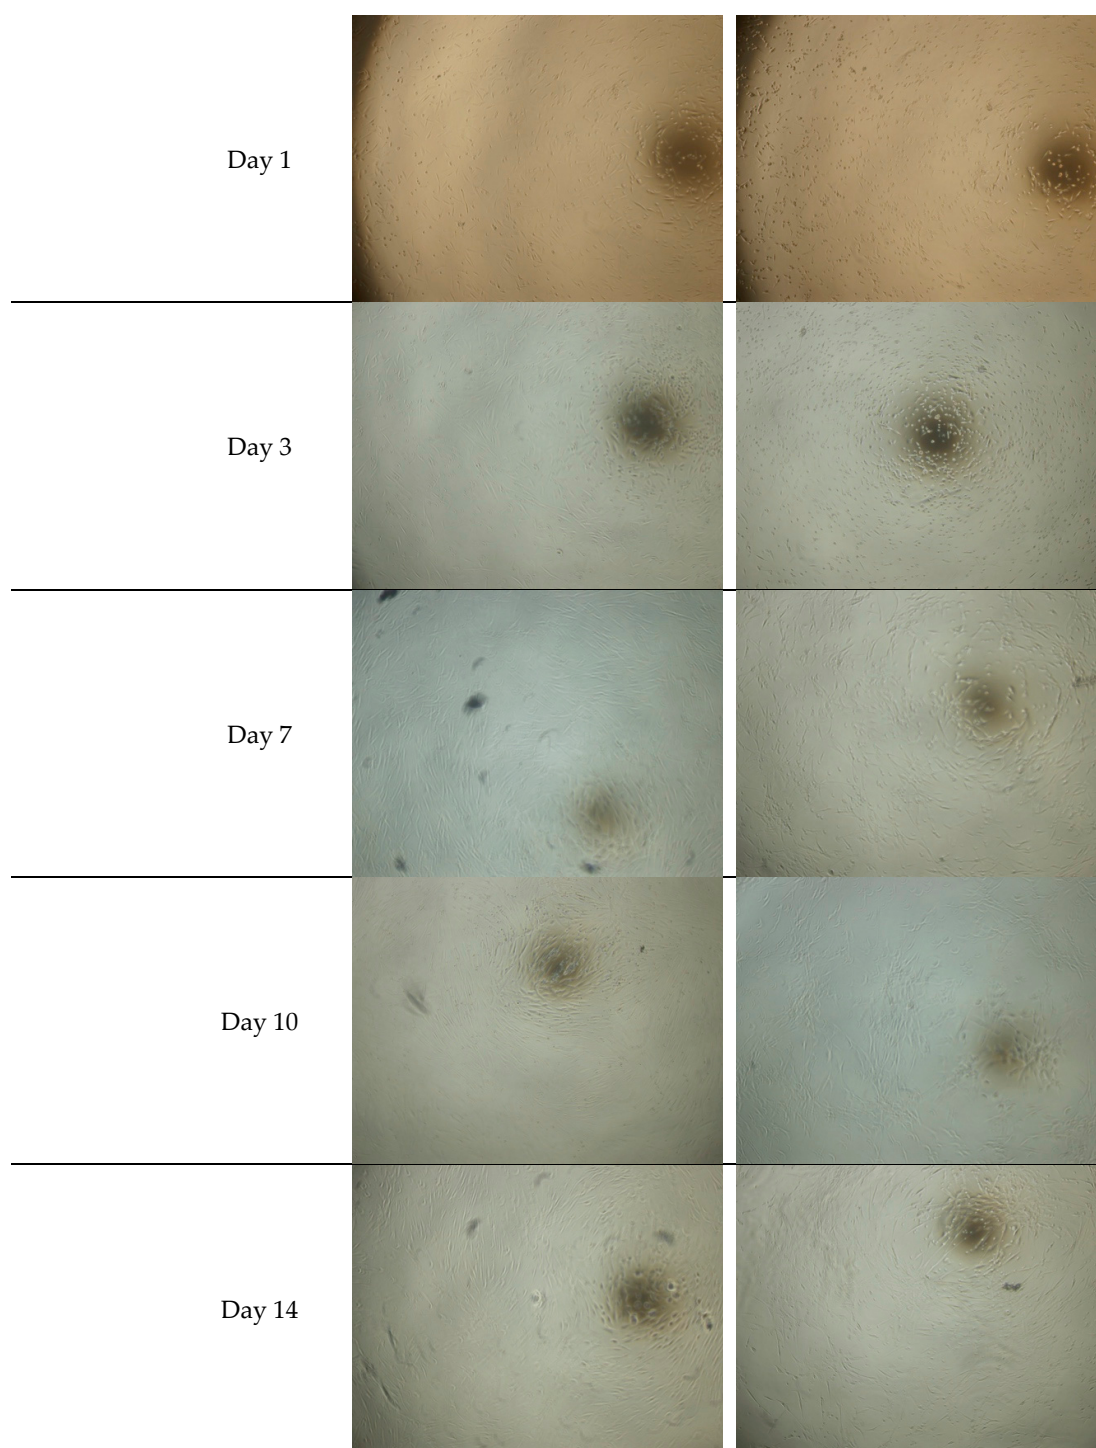

**Figure S3.** The light microscopic images (4× magnification) of human OMECs after 1, 3, 7, 10 and 14 days of culture on HA scaffolds dried for 3, 7, 10 or 14 days and coated with 1 mg/mL collagen IV. \* Cultured human OMECs on coated plastic 24-well-plate with 1 mg/mL collagen IV.

| Culture age | Magnification | Control *                                                                           | Coated mixture 5 with 1 mg/mL collagen IV                                            |
|-------------|---------------|-------------------------------------------------------------------------------------|--------------------------------------------------------------------------------------|
| 1 day       | 4×            | 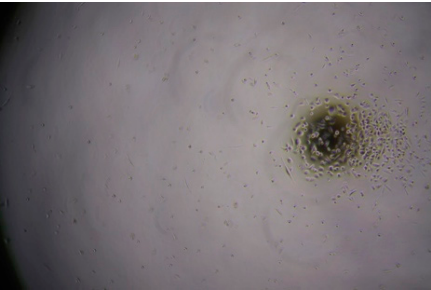   |    |
|             | 10×           |    |    |
|             | 20×           |   |   |
|             | 40×           |  |  |
| 3 days      |               |                                                                                     |                                                                                      |



4×

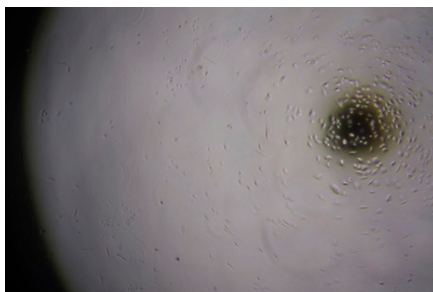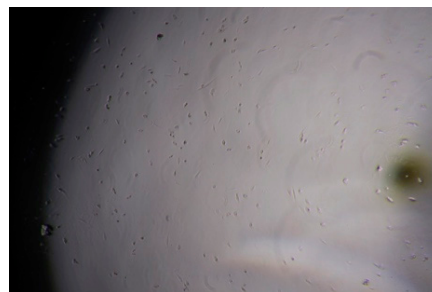

10×

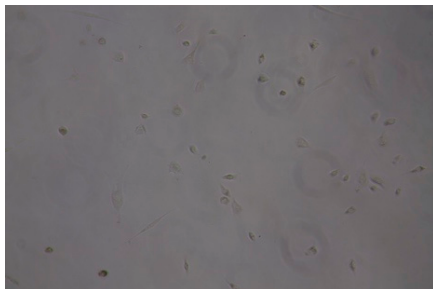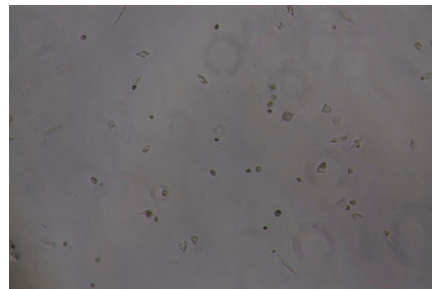

20×

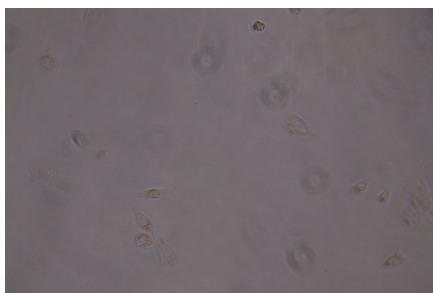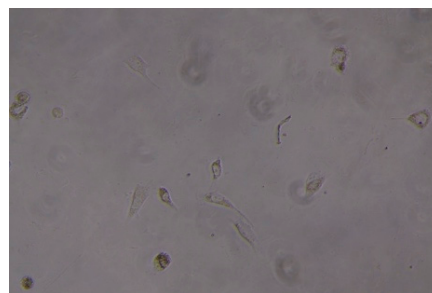

40×

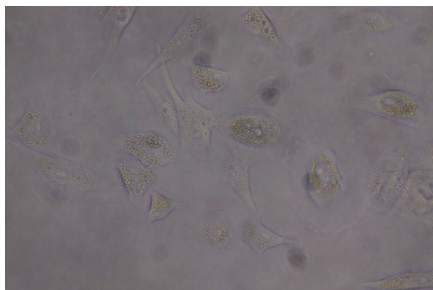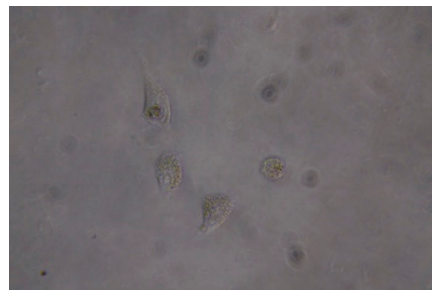

7 days

4×

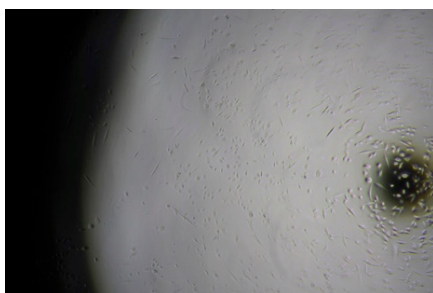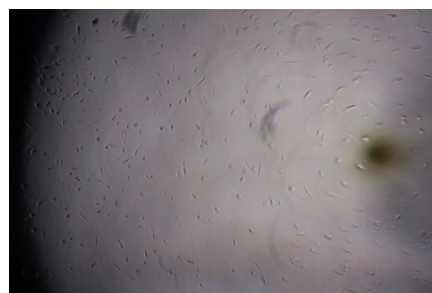

---

10×

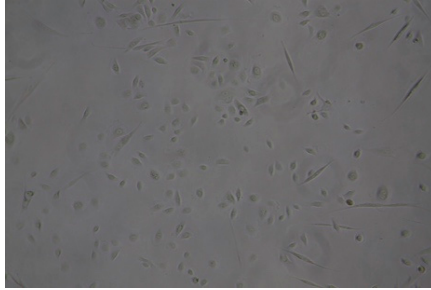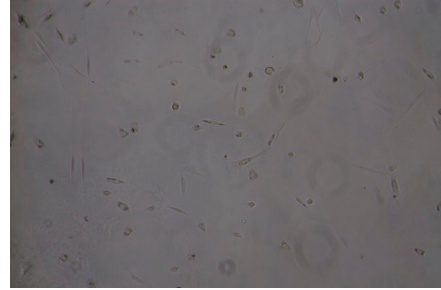

---

20×

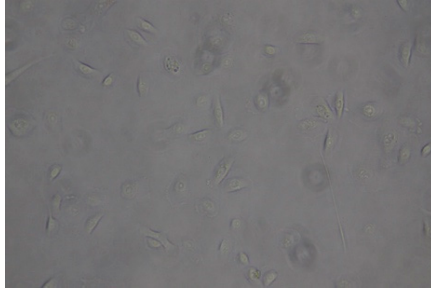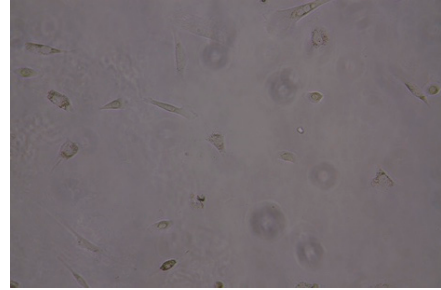

---

40×

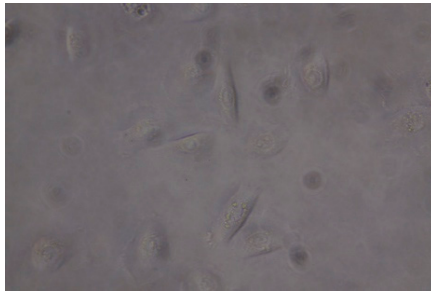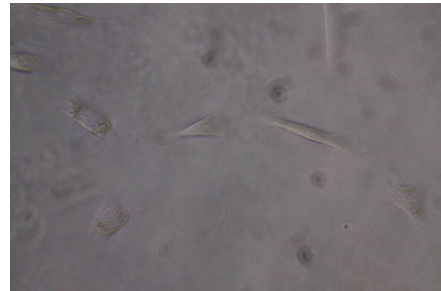

---

10 days

4×

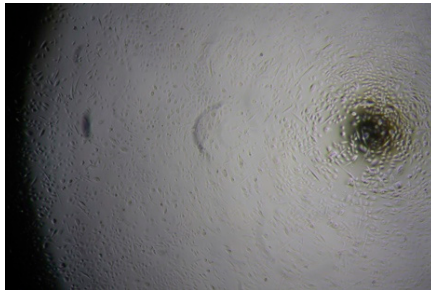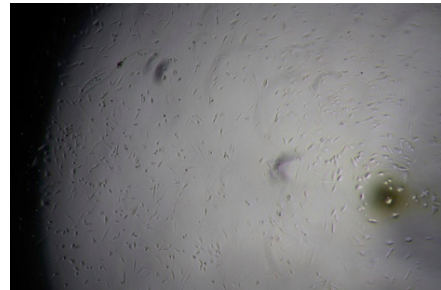

---

10×

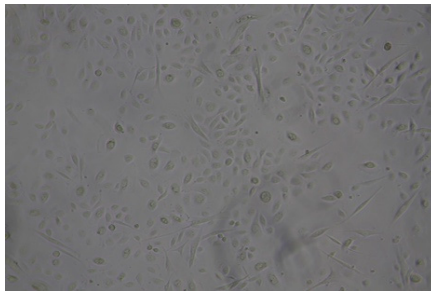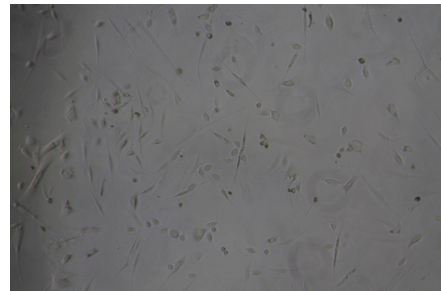

---

20×

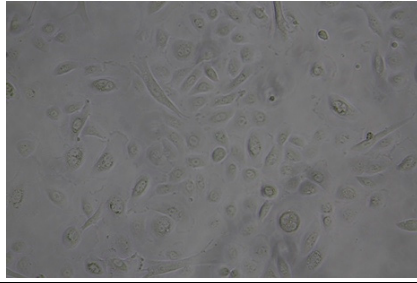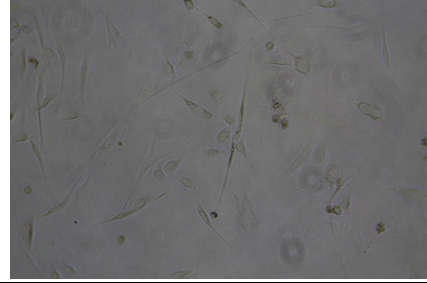

40×

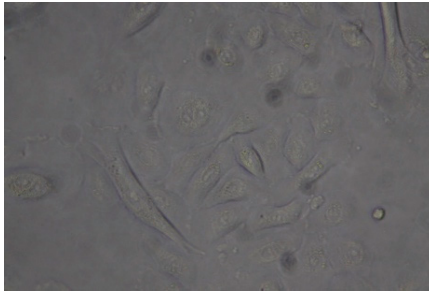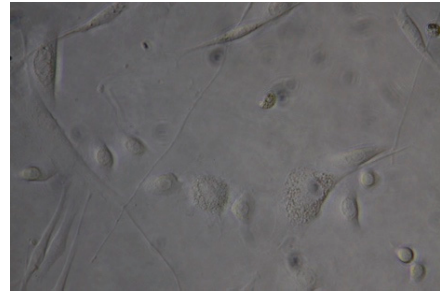

---

14 days

4×

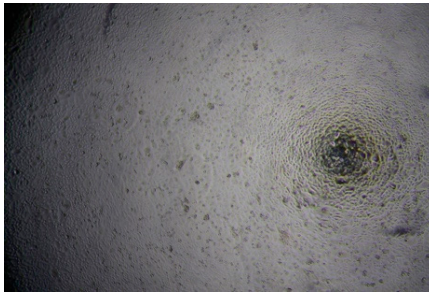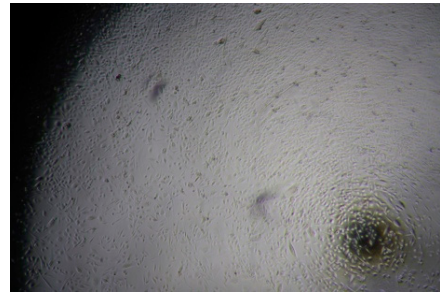

10×

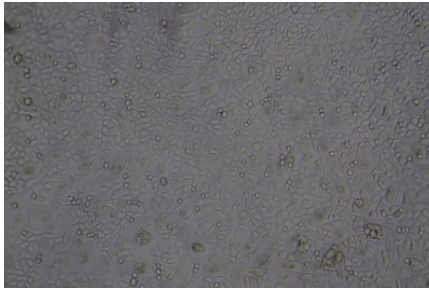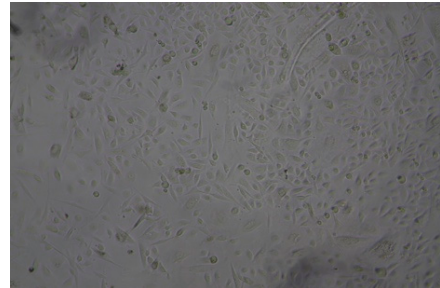

20×

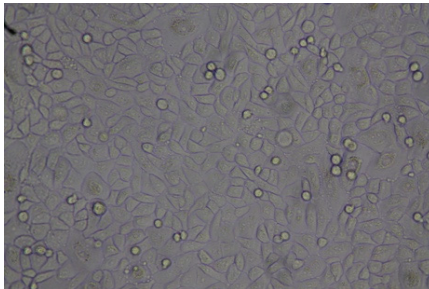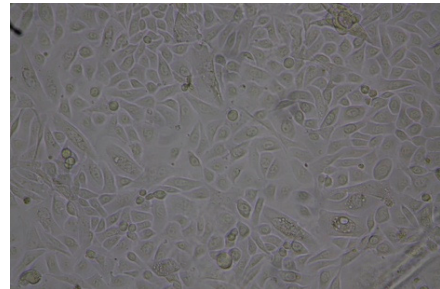



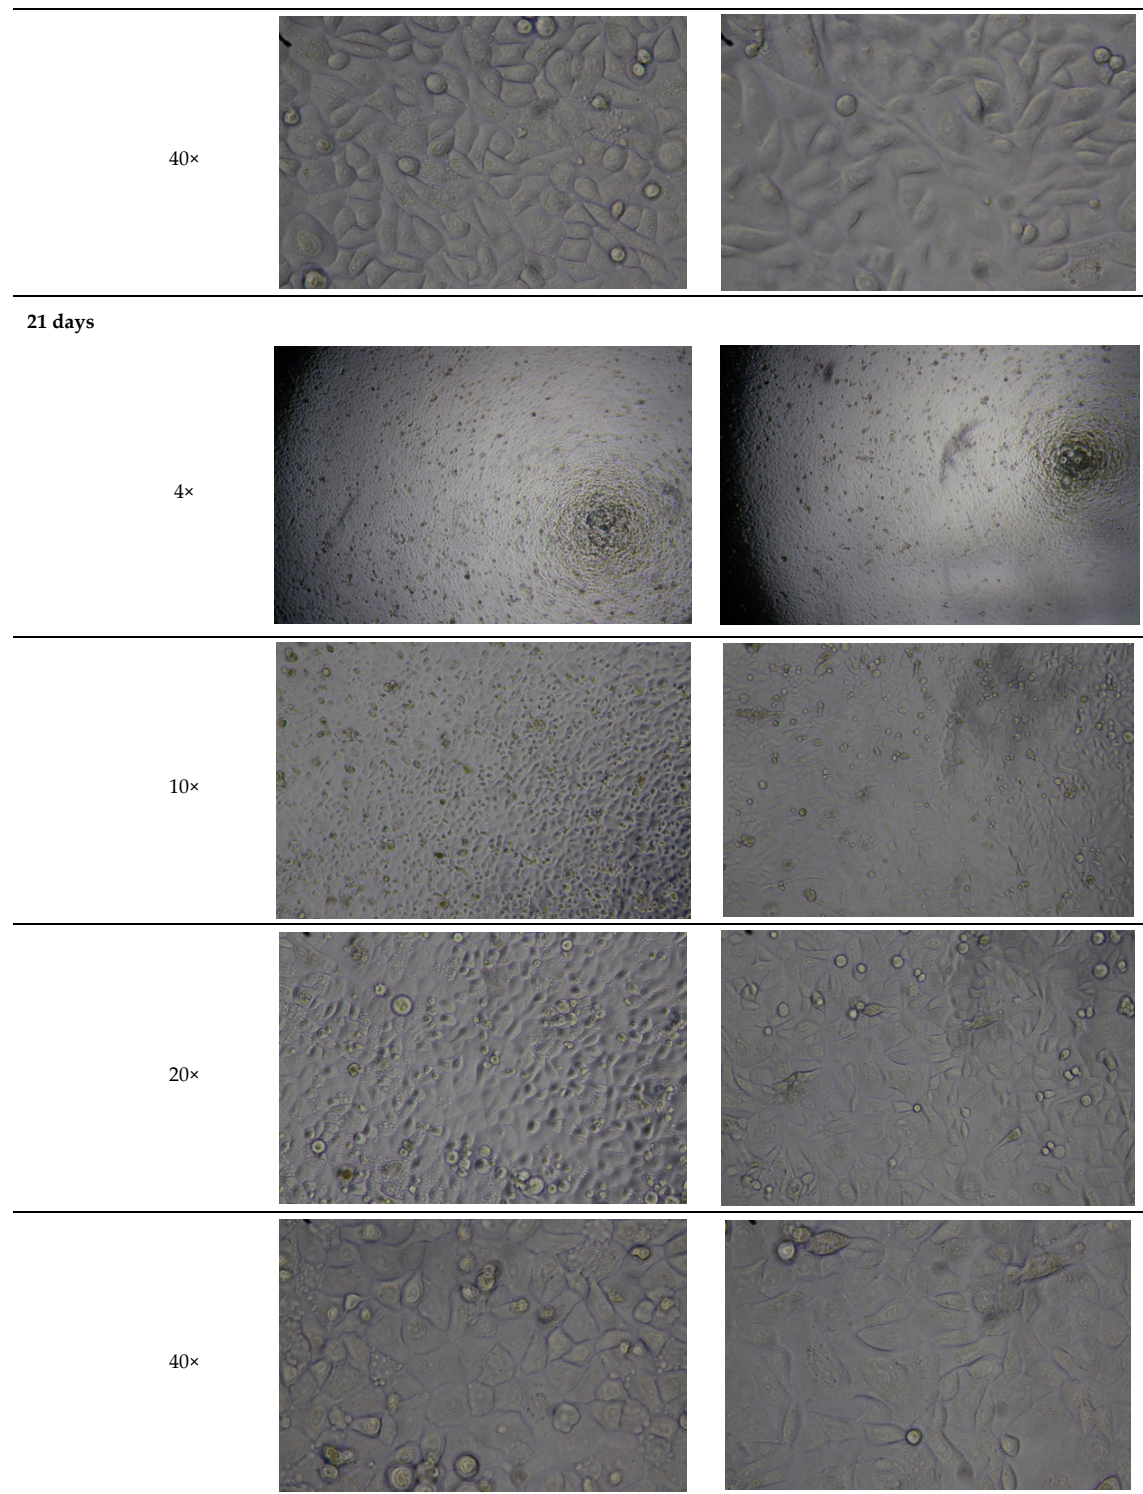

**Figure S4.** The light microscopic images (4×, 10×, 20× and 40× magnification) of human OMECs after 1, 3, 7, 10, 14 and 21 days of culture on HA scaffold dried for 3 days and coated with 1 mg/mL collagen IV. \* Cultured human OMECs on coated plastic 24-well-plate with 1 mg/mL collagen IV.
